# Supplementary material
Source: publisher figshare collection journal article supplement (https://acs.figshare.com/ndownloader/files/21881751)
Supplement: Supplementary file [file 21881751]

## Composition, Size and Surface Functionalization dependent Optical Properties of Lead Bromide Perovskite Nanocrystals

Palvasha Ijaz,<sup>1,2</sup> Muhammad Imran,<sup>1</sup> Márcio M. Soares,<sup>3</sup> Hélio C. N. Tolentino,<sup>3</sup> Beatriz Martín-García,<sup>1,4</sup> Cinzia Giannini,<sup>5</sup> Iwan Moreels,<sup>1,6</sup> Liberato Manna\*,<sup>1</sup> Roman Krahne\*<sup>1</sup>

<sup>1</sup>Department of Nanochemistry, <sup>4</sup>Graphene Labs, Istituto Italiano di Tecnologia, Via Morego 30, 16163 Genova, Italy

<sup>2</sup>Dipartimento di Chimica e Chimica Industriale, Università degli Studi di Genova, Via Dodecaneso 31, 16146 Genova, Italy

<sup>3</sup>Brazilian Synchrotron Light Laboratory (LNLS), Brazilian Center for Research in Energy and Materials (CNPEM), Campinas, SP, 13083-970, Brazil

<sup>5</sup>Istituto di Cristallografia - Consiglio Nazionale delle Ricerche (IC-CNR), via Amendola 122/O, I-70126 Bari, Italy

<sup>6</sup>Department of Chemistry, Ghent University, Krijgslaan 281-S3, 9000 Gent, Belgium

### Materials

Lead acetate trihydrate ((PbAc<sub>2</sub>·3H<sub>2</sub>O), 99.99%), cesium carbonate (Cs<sub>2</sub>CO<sub>3</sub>, reagent Plus, 99%), formamidinium (FA) acetate, methylamine (2 M solution in tetrahydrofuran, THF), benzoyl bromide (C<sub>6</sub>H<sub>5</sub>COBr, 97%), ethyl acetate (98.8%), toluene (anhydrous, 99.5%), didodecyldimethylammonium bromide, oleylamine (70%), octadecene (ODE, technical grade, 90%), and oleic acid (OA, 90%), were purchased from Sigma-Aldrich. Didodecylamine (DDDA, 97%), was purchased from TCI. All chemicals were used without any further purification unless stated otherwise.

**Synthesis of APbBr<sub>3</sub> (A=Cs, MA, FA) NCs:** First generation of APbBr<sub>3</sub> NCs were prepared using typical ligands such as oleic acid and oleylamine following a previously reported procedure.<sup>1</sup>

i) Synthesis of CsPbBr<sub>3</sub> NCs, 76 mg of lead (II) acetate trihydrate, 16 mg of cesium carbonate, 0.3 mL of oleic acid, 1.0 mL of oleylamine and 10 mL of ODE were combined in a 25 mL 3-neck flask equipped with a thermocouple and a magnetic stirrer. The reaction mixture was degassed for 5 min at room temperature and then for one hour at 120 °C. Next, the temperature was increased to 175 °C and a solution of benzoyl bromide (70 µL) in ODE (500 µL, which had previously been degassed for an hour at 120 °C and stored in glove box) was swiftly injected. The reaction mixture was immediately cooled down using an ice-water bath. Thereafter, 5 mL of toluene was added to the crude solution, then it was centrifuged at 5000 rpm for 10 min. The supernatant was discarded, and the precipitate was redispersed in 5 mL of toluene.

ii). Synthesis of MAPbBr<sub>3</sub> NCs: 76 mg of lead (II) acetate trihydrate, 2.5 mL of OA, 0.025 mL of OLAM, and 5 mL of ODE were mixed in a 25 mL 3-neck round-bottom flask and dried under vacuum for 1 h at

120 °C. Next, the temperature was lowered to 65 °C and a methylamine solution (0.170 mL) was injected, followed by the swift injection of benzoyl bromide solution (70  $\mu$ L) in ODE (500  $\mu$ L, which had previously been degassed for an hour at 120 °C and stored in glove box). The reaction mixture was quenched by the addition of 5 mL of toluene after 30 s and NCs were collected by centrifuging the crude solution at 4000 rpm for 10 min. The supernatant was discarded, and the precipitate was redispersed in 5 mL of toluene.

iii) Synthesis of FAPbBr<sub>3</sub> NCs: 76 mg of lead (II) acetate trihydrate, formamidinium acetate (40 mg), 2.5 mL of OA, 0.025 mL of OLAM, and 5 mL of ODE were mixed in a 25 mL 3-neck round-bottom flask and dried under vacuum for 1 h at 120 °C. Then, the temperature was lowered to 75°C under N<sub>2</sub>, and a solution of benzoyl bromide (70  $\mu$ L) in ODE (500  $\mu$ L, which had previously been degassed for an hour at 120 °C and stored in glove box) was swiftly injected. After 30 s, the reaction mixture was cooled down in an ice–water bath. Thereafter, 5 mL of toluene was added to the crude solution, then it was centrifuged at 5000 rpm for 10 min. The supernatant was discarded, and the precipitate was redispersed in 5 mL of toluene for further use.

#### **Synthesis of Cs-Oleate capped CsPbBr<sub>3</sub> NCs:**

Cs-oleate capped CsPbBr<sub>3</sub> NCs were synthesized following our previously reported procedure using standard Schlenk line techniques.<sup>2</sup> Briefly, lead (II) acetate trihydrate (76 mg) cesium carbonate (16 mg) and ODE (10 mL) were combined in a 25 mL 3-neck flask equipped with a thermocouple and a magnetic stirrer. The reaction mixture was degassed for 5 min at room temperature and then for one hour at 115 °C. Then, a ligand mixture containing oleic acid (1.5 mL, previously degassed for an hour at 120 °C and stored in glove box), didodecylamine (1.25 mmol, 443 mg) dissolved in 1 mL of anhydrous toluene was rapidly injected under nitrogen. After the complete dissolution of the metal precursors, the temperature was decreased to 70 °C and a solution of benzoyl bromide (50  $\mu$ L) in anhydrous toluene (500  $\mu$ L) was swiftly injected. After 60 s, the reaction mixture was cooled down by using a water bath. Then 20 mL of an ethyl acetate and toluene mixture (with a ratio of 6:1) was added into the crude solution to destabilize the colloids followed by centrifugation at 6000 rpm for 10 min. Finally, the supernatant was discarded, and the precipitate was redispersed in toluene.

**Synthesis of QAB capped CsPbBr<sub>3</sub> NCs:** QAB capped CsPbBr<sub>3</sub> NCs were prepared following a previously reported ligand exchange strategy.<sup>3</sup> Briefly, Cs-oleate capped NCs were prepared following above mentioned procedure<sup>2</sup> and the crude reaction mixture containing the CsPbBr<sub>3</sub> NCs (3 mL) was treated with an anhydrous toluene solution containing the didodecyldimethylammonium bromide salt (2 mL, 0.025M) and the mixture was vigorously stirred for 1 min. Thereafter, the NCs were washed by addition of 15 mL of ethyl acetate followed by centrifugation at 6000 rpm for 10 min and re-dispersion in toluene.

**Transmission Electron Microscopy (TEM):** Bright field TEM images were acquired on samples prepared by drop-casting diluted colloidal solutions on carbon film-coated 200 mesh copper grids, using a JEOL-1100 microscope operating at an acceleration voltage of 100 kV.

**Steady-state UV-VIS Absorbance and Photoluminescence:** Absorbance and photoluminescence spectra of dilute toluene dispersions in quartz cuvettes (1-cm path length) were recorded using a Varian Cary 300 UV-VIS spectrophotometer. The photoluminescence spectra were acquired using an excitation wavelength of 350 nm.

**NC film preparation:** Colloidal dispersions with a concentration of NCs of 18±2 mg/mL were used to prepare NCs films. Briefly, each sapphire substrate was washed with acetone and dried with compressed air. Then, 30  $\mu$ L of NCs dispersion was drop-cast on the sapphire substrate and the solvent was allowed to evaporate.

**Temperature dependent Photoluminescence Measurements:** Steady-state PL spectra and time resolved PL (TRPL) lifetime were recorded with an Edinburgh Instruments fluorescence spectrometer (FLS920) coupled to an optical fiber. The nanocrystal films deposited on a sapphire substrate (TedPella®) were placed inside a closed-cycle helium cryostat (Advanced Research Systems, Inc.). The steady-state PL was collected by exciting the sample with a 405 nm laser diode at 50 ns repetition period. The PL decay traces were recorded at the PL peak position by exciting the sample at 405 nm using a 50 ps laser diode at a repetition rate of 0.5-200 MHz and an emission bandwidth of 1-5 nm.

**Temperature dependent X-ray Diffraction (XRD):** The XRD data was collected at the XPD beamline of the Brazilian Synchrotron Light Laboratory (LNLS), in the temperature range from 300 K down to 20 K using a He closed cycle cryostat. Measurements were performed at 10 keV energy ( $\lambda=1.23984$  Å) in

the Bragg-Brentano geometry using a 1D Mythen detector. The instrumental function has been determined from a NIST  $\text{Al}_2\text{O}_3$  standard.

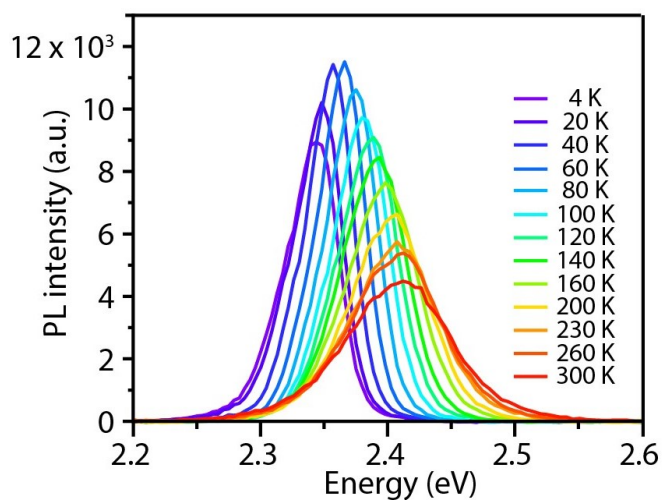

**Figure S1.** Photoluminescence (PL) spectra measured from 4 K to 300 K for mixed ligands capped CsPbBr<sub>3</sub> NCs.

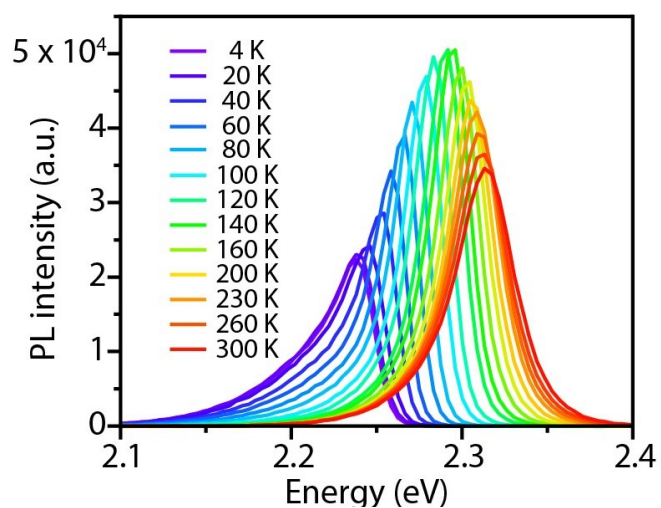

**Figure S2.** PL spectra measured from 4 K to 300 K for mixed ligands capped MAPbBr<sub>3</sub> NCs.

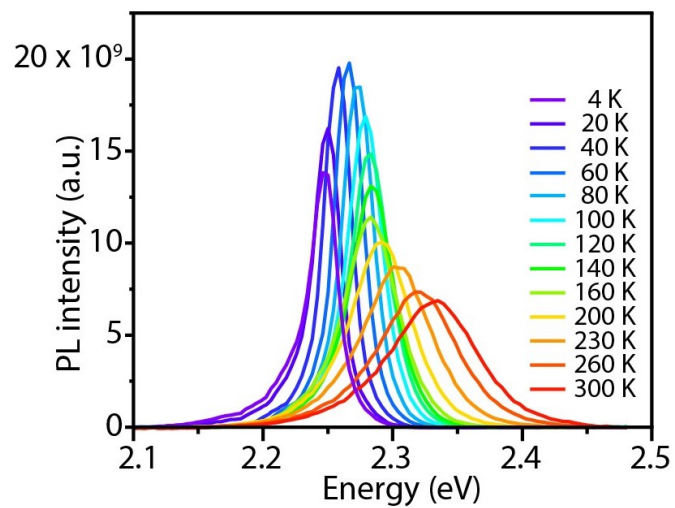

**Figure S3.** PL spectra measured from 4 K to 300 K for mixed ligands capped FAPbBr<sub>3</sub> NCs.

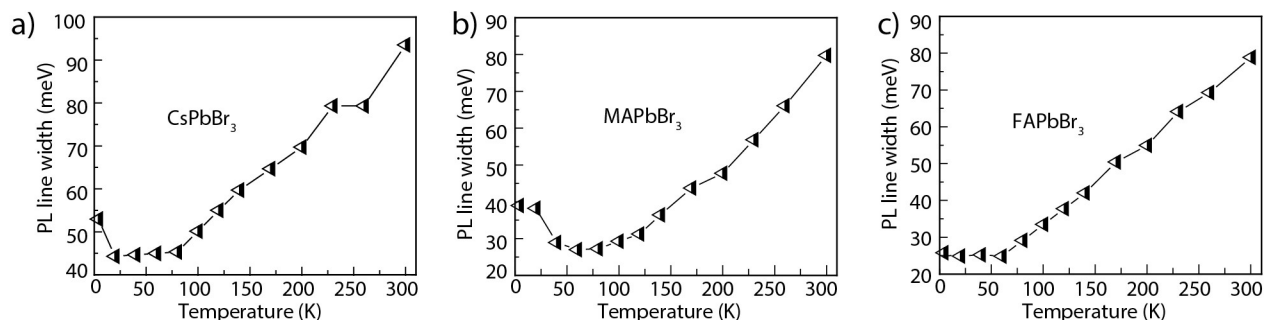

**Figure S4.** Evolution of PL line width as a function of temperature for mixed ligand capped (a) CsPbBr<sub>3</sub>, (b) MAPbBr<sub>3</sub> and (c) FAPbBr<sub>3</sub> NC films.

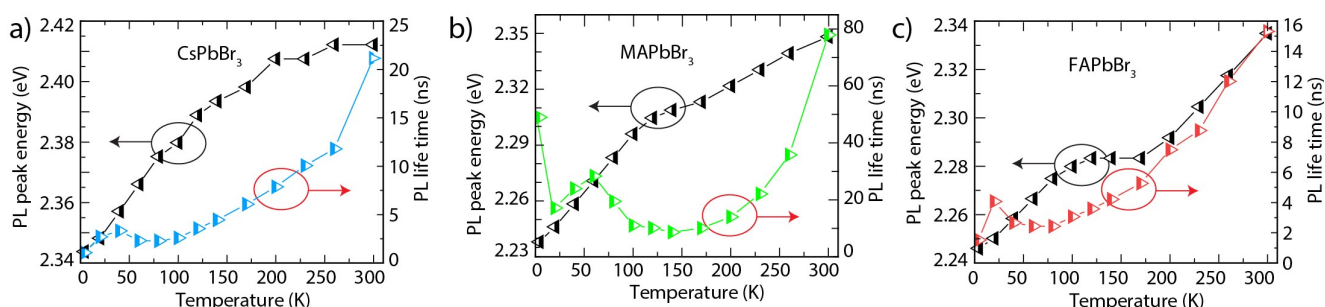

**Figure S5.** PL peak energy and PL lifetimes at elevated temperatures for mixed ligand capped (a) CsPbBr<sub>3</sub>, (b) MAPbBr<sub>3</sub> and (c) FAPbBr<sub>3</sub> NC films.

**Table S1.** Parameters of the exponential fitting of the PL decay traces, and the average PL lifetimes of CsPbBr<sub>3</sub> NCs obtained from the traces in Figure 2c:

| Temperature (K) | A <sub>1</sub> | τ <sub>1</sub> (ns) | A <sub>2</sub> | τ <sub>2</sub> (ns) | A <sub>3</sub> | τ <sub>3</sub> (ns) | τ <sub>AVG</sub> (ns) |
|-----------------|----------------|---------------------|----------------|---------------------|----------------|---------------------|-----------------------|
| 4               | 13689          | 0.56                | 1366           | 2.32                |                |                     | 1.08                  |
| 20              | 12185          | 0.75                | 548            | 7.23                |                |                     | 2.71                  |
| 40              | 9474           | 0.92                | 3744           | 2.56                | 456.54         | 9.74                | 3.33                  |
| 60              | 10691          | 1.20                | 4217           | 2.27                | 320.89         | 8.01                | 2.31                  |
| 80              | 10385          | 1.64                | 3425           | 1.60                | 829.84         | 5.56                | 2.30                  |
| 100             | 9666           | 1.94                | 2713           | 1.47                | 1998.24        | 4.48                | 2.60                  |
| 120             | 9597           | 2.45                | 1289           | 4.81                | 234.50         | 10.83               | 3.56                  |
| 140             | 9773           | 3.30                | 171            | 7.38                | 612.63         | 9.98                | 4.46                  |
| 170             | 9561           | 4.41                | 159            | 10.32               | 954.33         | 11.73               | 6.08                  |
| 200             | 7983           | 5.08                | 1333           | 10.91               | 2096.93        | 10.89               | 7.87                  |
| 230             | 5950           | 5.17                | 3107           | 10.39               | 2868.11        | 13.65               | 10.07                 |
| 260             | 6335           | 6.61                | 2634           | 14.66               | 2752.49        | 14.47               | 11.80                 |
| 300             | 4735           | 6.43                | 3485           | 27.09               | 4053.17        | 19.75               | 21.15                 |

**Table S2.** Parameters of the exponential fitting of the PL decay traces, and the average PL lifetimes of MAPbBr<sub>3</sub> NCs obtained from the traces in Figure 2c:

| Temperature (K) | A <sub>1</sub> | $\tau_1$ (ns) | A <sub>2</sub> | $\tau_2$ (ns) | A <sub>3</sub> | $\tau_3$ (ns) | A <sub>4</sub> | $\tau_4$ (ns) | $\tau_{AVG}$ (ns) |
|-----------------|----------------|---------------|----------------|---------------|----------------|---------------|----------------|---------------|-------------------|
| 4               | 10532          | 0.68          | 2635           | 3.22          | 528.63         | 21.55         | 97             | 131.00        | 48.97             |
| 20              | 9835           | 1.04          | 2376           | 4.11          | 224.6          | 22.67         | 14             | 144.48        | 17.16             |
| 40              | 10128          | 1.17          | 1554           | 5.66          | 204.98         | 28.10         | 18             | 159.30        | 23.96             |
| 60              | 9799           | 1.39          | 1769           | 6.28          | 278.97         | 29.14         | 21             | 182.59        | 28.33             |
| 80              | 9608           | 1.82          | 1754           | 8.03          | 197.52         | 32.75         | 14             | 173.26        | 19.47             |
| 100             | 7468           | 1.35          | 5266           | 4.26          | 1007.19        | 13.95         | 55             | 67.24         | 11.04             |
| 120             | 8518           | 3.94          | 2082           | 11.87         | 20.52          | 94.11         |                |               | 10.09             |
| 140             | 1669           | 2.85          | 5147           | 6.94          | 351.81         | 20.78         |                |               | 8.65              |
| 170             | 1096           | 2.74          | 6341           | 8.21          | 676.40         | 19.13         |                |               | 10.05             |
| 200             | 1689           | 4.13          | 6252           | 12.67         | 480.86         | 27.39         |                |               | 14.02             |
| 230             | 1527           | 4.86          | 6464           | 18.45         | 691.56         | 41.54         |                |               | 22.07             |
| 260             | 2367           | 8.30          | 6351           | 29.40         | 266.50         | 100.48        |                |               | 35.78             |
| 300             | 2697           | 7.72          | 5044           | 37.11         | 1568.71        | 124.49        |                |               | 77.9              |

**Table S3.** Parameters of the exponential fitting of the PL decay traces, and the average PL lifetimes of FAPbBr<sub>3</sub> NCs obtained from the traces in Figure 2c:

| Temperature (K) | A <sub>1</sub> | $\tau_1$ (ns) | A <sub>2</sub> | $\tau_2$ (ns) | $\tau_{AVG}$ (ns) |
|-----------------|----------------|---------------|----------------|---------------|-------------------|
| 4               | 11386          | 0.53          | 224            | 5.98          | 1.52              |
| 20              | 8251           | 0.68          | 709            | 7.59          | 4.07              |
| 40              | 7433           | 1.01          | 292            | 7.99          | 2.66              |
| 60              | 9956           | 0.96          | 380            | 7.43          | 2.44              |
| 80              | 9253           | 1.10          | 431            | 6.95          | 2.43              |
| 100             | 9272           | 1.39          | 632            | 7.57          | 3.06              |
| 120             | 9184           | 1.69          | 896            | 7.79          | 3.58              |
| 140             | 9060           | 1.98          | 1526           | 7.65          | 4.21              |
| 170             | 8701           | 2.57          | 1962           | 8.78          | 5.27              |
| 200             | 8394           | 3.21          | 2502           | 11.50         | 7.49              |
| 230             | 6450           | 3.51          | 4712           | 11.05         | 8.76              |
| 260             | 5009           | 3.78          | 5897           | 13.92         | 12.02             |
| 300             | 4136           | 4.12          | 6342           | 17.08         | 15.31             |

The temperature dependence of the PL linewidth can be described by the following equation<sup>4</sup>:

$$\Gamma(T) = \Gamma_0 + \Gamma_{AC}T + \Gamma_{LO} \left[ \exp\left(-E_{LO}/K_B T\right) - 1 \right]^{-1}$$

Where  $\Gamma_0$  is the inhomogeneous broadening,  $\Gamma_{AC}$  and  $\Gamma_{LO}$  describe the coupling strength to the acoustical and LO phonons, respectively, and  $E_{LO}$  is the energy of the LO phonon.  $K_B$  is the Boltzmann constant. The values obtained from the fitting shown in Figure S6 are summarized in Table S4.

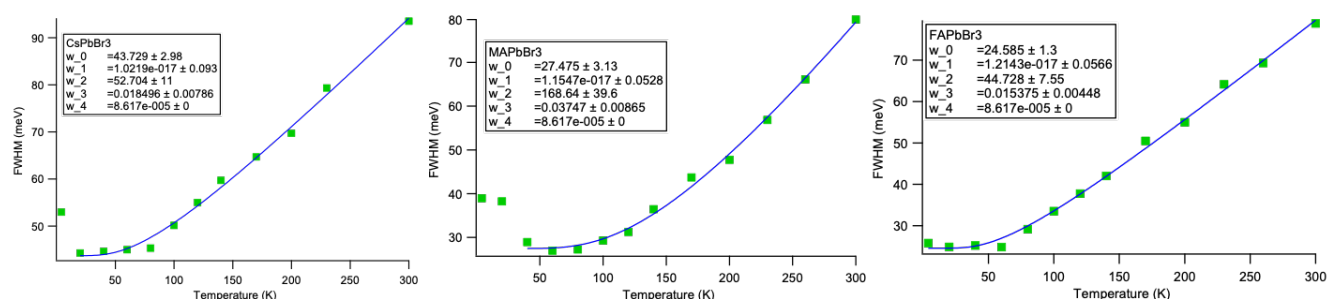

**Figure S6.** Fitting of the temperature dependence of the PL linewidth of CsPbBr<sub>3</sub> (a), MAPbBr<sub>3</sub> (b), and FAPbBr<sub>3</sub> (c) NCs with equation S1.

**Table S4.** Parameters obtained from the fitting in Figure S6.

| NC composition      | $\Gamma_0$ (meV) | $\Gamma_{AC}$ (meV) | $\Gamma_{LO}$ (meV) | $E_{LO}$ (meV) |
|---------------------|------------------|---------------------|---------------------|----------------|
| CsPbBr <sub>3</sub> | 43.7 ± 3.0       | 0 ± 0.09            | 53 ± 11             | 18.5 ± 7.9     |
| MAPbBr <sub>3</sub> | 27.5 ± 3.1       | 0 ± 0.05            | 169 ± 40            | 37.5 ± 8.6     |
| FAPbBr <sub>3</sub> | 24.6 ± 1.3       | 0 ± 0.06            | 45 ± 8              | 15.4 ± 4.5     |

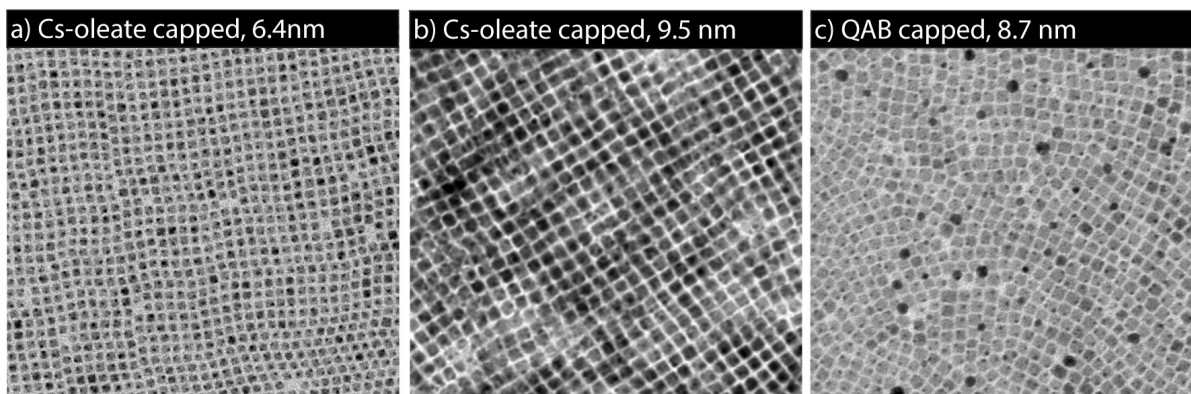

**Figure S7.** (a,b) TEM images of Cs-oleate capped CsPbBr<sub>3</sub> NCs with different size, and of QAB passivated NCs obtained by ligand exchange.



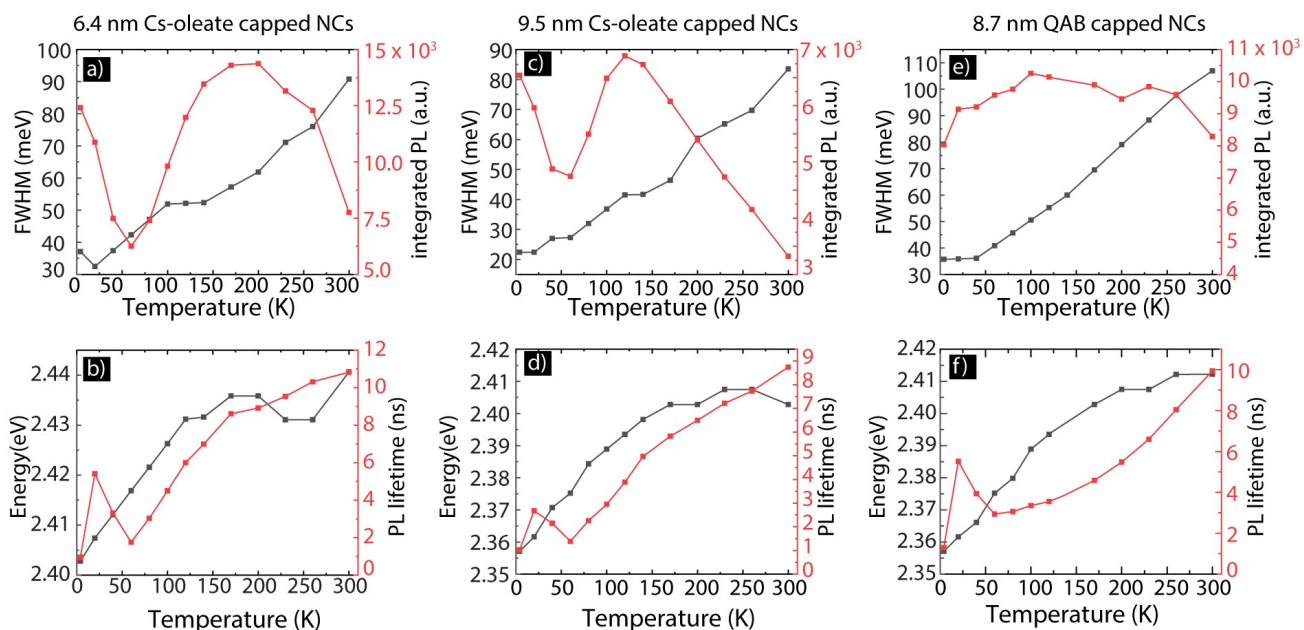

**Figure S8.** PL linewidth, intensity, peak position and average life time extracted from the spectra in Figure 4 (d-f).

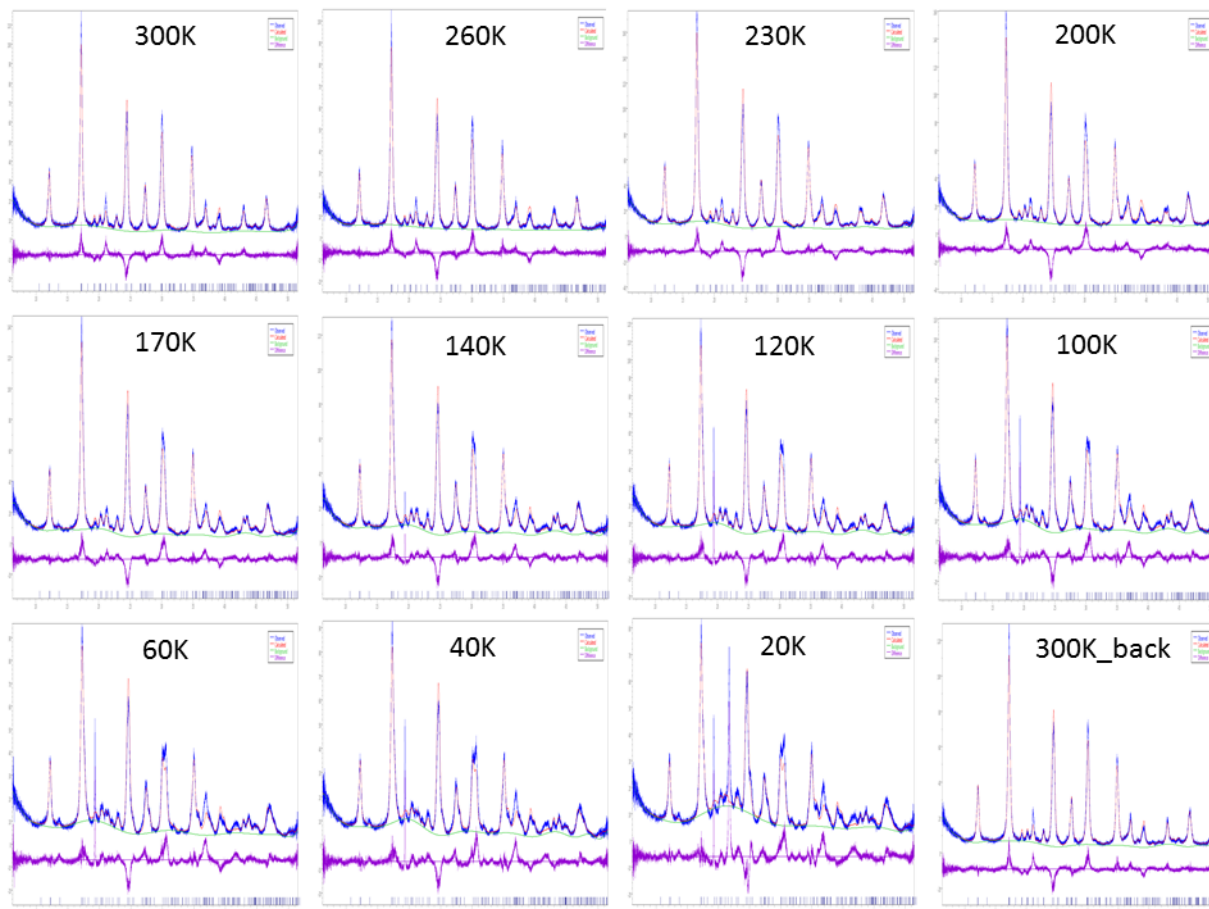

**Figure S9.** XRD spectra recorded at different temperatures for mixed ligands capped CsPbBr<sub>3</sub> NCs. We observed the appearance of additional sharp peaks from 140K down to 20K, which disappeared when the NCs film was heated back to 300K. We attribute these peaks to the formation of a thin ice layer at the sample surface after few hours of measurements at a pressure of at  $10^{-6}$  mbar, or to frozen organics.

**Table S5:** Thermally induced variation in the cell parameters of mixed ligands capped CsPbBr<sub>3</sub> NCs

| T (K) | a       | b       | c        | Cell Volume |
|-------|---------|---------|----------|-------------|
| 300   | 8.25906 | 8.28831 | 11.80331 | 807.98      |
| 260   | 8.22196 | 8.29093 | 11.78364 | 803.26      |
| 230   | 8.1856  | 8.27942 | 11.75434 | 796.62      |
| 200   | 8.1567  | 8.28185 | 11.73239 | 792.55      |
| 170   | 8.13283 | 8.28185 | 11.71081 | 787.92      |
| 140   | 8.10704 | 8.27305 | 11.68789 | 783.91      |
| 120   | 8.07976 | 8.2567  | 11.65699 | 777.66      |
| 100   | 8.08407 | 8.26566 | 11.66956 | 779.76      |
| 60    | 8.08502 | 8.29994 | 11.68757 | 784.3       |
| 40    | 8.05959 | 8.27552 | 11.65278 | 777.21      |
| 20    | 8.067   | 8.30508 | 11.70342 | 784.1       |
| 17    | 8.06812 | 8.3067  | 11.69584 | 783.85      |
| 300   | 8.25849 | 8.28184 | 11.80030 | 807.09      |

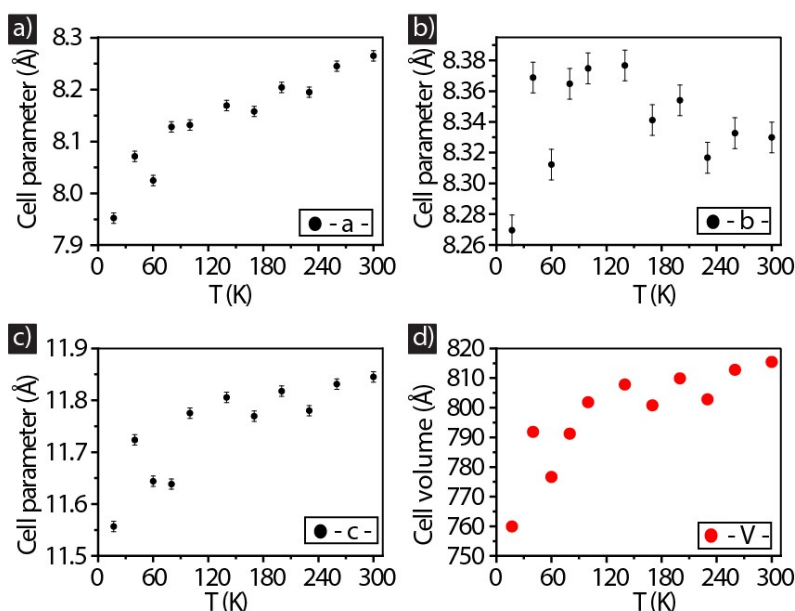

**Figure S10:** Cell parameters (a,b,c,V) obtained from the temperature dependent XRD measurements of Cs-oleate capped CsPbBr<sub>3</sub> nanocrystals. The data yields a thermally induced expansion in unit cell while retaining the orthorhombic phase.

## References:

- (1) Imran M, Caligiuri V, Wang M, Goldoni L, Prato M, Krahne R, De Trizio L, Manna L. Benzoyl halides as alternative precursors for the colloidal synthesis of lead-based halide perovskite nanocrystals. *J. Am. Chem. Soc.* **2018**, 140, 2656-2664
- (2) Imran M, Ijaz P, Baranov D, Goldoni L, Petralanda U, Akkerman Q, Abdelhady AL, Prato M, Bianchini P, Infante I, Manna L. Shape-Pure, Nearly monodispersed CsPbBr<sub>3</sub> nanocubes prepared using secondary aliphatic amines. *Nano Lett.* **2018**, 18, 7822-7831
- (3) Imran M, Ijaz P, Goldoni L, Maggioni D, Petralanda U, Prato M, Almeida G, Infante I, Manna L. Simultaneous cationic and anionic ligand exchange for colloidally stable CsPbBr<sub>3</sub> nanocrystals. *ACS Energy Lett.* **2019**, 4, 819-824
- (4) Woo, H. C.; Choi, J. W.; Shin, J.; Chin, S.-H.; Ann, M. H.; Lee, C.-L. Temperature-dependent photoluminescence of CH<sub>3</sub>NH<sub>3</sub>PbBr<sub>3</sub> perovskite quantum dots and bulk counterparts. *J. Phys. Chem. Lett.* **2018**, 9, 4066-4074
